# Supplementary material for: Marine-Derived 2-Aminoimidazolone Alkaloids. Leucettamine B-Related Polyandrocarpamines Inhibit Mammalian and Protozoan DYRK & CLK Kinases
Source: PubMed Central journal article supplement (PMC5666424; doi:10.3390/md15100316), 2017-10-17
Supplement: marinedrugs-15-00316-s001.pdf [file marinedrugs-15-00316-s001.pdf]

**SUPPLEMENTARY DATA****Marine Derived 2-Aminoimidazolone Alkaloids. Leucettamine B-Related Polyandrocarpamines Inhibit Mammalian and Protozoan DYRK & CLK Kinases.**

Nadège LOAËC, Eletta ATTANASIO, Benoît VILLIERS, Emilie DURIEU, Tania TAHTOUH, Morgane CAM, Rohan A. DAVIS, Aline ALENCAR, Mélanie ROUE, Marie-Lise BOURGUET-KONDRACKI, Peter PROKSCH, Emmanuelle LIMANTON, Solène GUIHENEUF, François CARREAUX, Jean-Pierre BAZUREAU, Michelle KLAUTAU and Laurent MEIJER

**SUPPLEMENTARY RESULTS**

Phylogeny of calcareous sponges, with special emphasis of *Leucetta* and *Clathrina* 2

**SUPPLEMENTARY MATERIAL & METHODS** 3

**SUPPLEMENTARY TABLES**

**Supplementary Table S1.** Analysed specimens 4

**Supplementary Table S2.** Aminoimidazole alkaloids from marine invertebrates 5

**Supplementary Table S3.** Kinase orthologues from unicellular parasites 6

**Supplementary Table S4.** DiscoverX KinomeScan® kinase selectivity panel 7

**SUPPLEMENTARY FIGURES**

**Supplementary Figure S1.** *Leucetta microraphis* 12

**Supplementary Figure S2.** *Leucetta chagosensis* 13

**Supplementary Figure S3.** *Clathrina clathrus* 14

**Supplementary Figure S4.** Maximum likelihood tree 15

**Supplementary Figure S5.** Structure of aminoimidazole alkaloids

16

**SUPPLEMENTARY REFERENCES** 20

## SUPPLEMENTARY RESULTS

### Phylogeny of calcareous sponges, with special emphasis of *Leucetta* and *Clathrina*.

Given the importance of *Leucetta* and *Clathrina* in the production of various 2-aminoindazolinones, we provide here a full description of both genera and the three major species that have been investigated for 2-aminoindazolinones, namely *Leucetta microraphis* (Figure S1), *Leucetta chagosensis* (Figure S2) and *Clathrina clathrus* (Figure S3). We also provide a phylogenetic tree of all species that have been described in the Clathrinida order (Figure S4).

#### 1. *Leucetta* Haeckel 1872

The family Leucettidae de Laubenfels, 1936 reunites two genera, *Leucetta* and *Pericharax* Poléjaeff, 1883, which are differentiated only by the presence of subcortical lacunae in the latter. Therefore, both *Pericharax* and *Leucetta* are sponges with a solid body and leuconoid aquiferous system. The choanoskeleton is well-developed and composed of regular triactines and/or tetractines (Borojevic *et al.*, 2002). *Leucetta* is a very abundant and cosmopolitan genus whose species are mainly distributed in tropical seas (Borojevic *et al.*, 2002). They are massive and more conspicuous than most calcareous sponges.

#### *Leucetta microraphis* Haeckel, 1872 (Figure S1)

*Leucetta microraphis* has already been reported as white, green (Dendy, 1892) and brownish-yellow or greenish-yellow (Wörheide & Hooper, 1999) in life (Figure S1, G). After fixation it becomes white to dark beige (Figure S1, A). Its body is massive and amorphous with single or multiple apical naked oscula. Surface is hispid due to the presence of many colossal triactines and texture is friable. The atrial cavity is reduced and the aquiferous system is leuconoid, with rounded choanocyty chambers. There is no differentiation between the cortical and the choanosomal skeletons. The cortical skeleton is thin and composed of colossal and abundant triactines tangentially disposed over small triactines. The choanoskeleton is dense, composed mainly of small triactines but also of several colossal triactines. Small tetractines surround the large exhalant canals and project their apical actines into them. The atrial skeleton is composed mainly of small triactines, but colossal triactines and small tetractines are also present.

#### SPICULES

Small triactines (Figure S1, D): regular (equiradiate and equiangular). Actines are conical with sharp tips (120-193.7 ( $\pm 27.1$ )-250/ 20-20 ( $\pm 0$ )-20  $\mu\text{m}$ ), n=30 (syntype PMJ 133).

Colossal triactines (Figure S1, E): regular (equiradiate and equiangular). Actines are conical with sharp tips (655-1,036 ( $\pm 239.3$ )-1,450/ 75-158.3 ( $\pm 47$ )-225  $\mu\text{m}$ ), n=30, (syntype PMJ 133).

Small tetractines (Figure S1, F): regular (equiradiate and equiangular). Actines are conical with sharp tips (140-162.7 ( $\pm 27.8$ )-280/ 20-20 ( $\pm 0$ )-20  $\mu\text{m}$ ), n=30, (syntype PMJ 133). The apical actine is shorter and thinner than the basal ones. It is cylindrical and slightly curved near the tip.

#### HABITAT AND DISTRIBUTION

*Leucetta microraphis* is a common species in the Indo-Pacific, where it can be found in exposed and light-protected areas, such as crevices and steep walls (Wörheide & Hooper, 1999). The distribution of *L. microraphis* has already been considered cosmopolitan, including the Indo-Pacific, Atlantic, Mediterranean, Red Sea and Antarctica (see Wörheide & Hooper, 1999). However, in 2009, Valderrama *et al.* (2009) showed that what had been called *L. microraphis* in the Atlantic was in fact *L. floridana*. Presently, *L. microraphis* is considered to be present only in the Indo-Pacific, but even this more restricted distribution may still be hiding other species. Its currently accepted distribution is Australia, New Zealand, New Caledonia, French Polynesia and Madagascar. Although Haeckel (1872) had not made clear where the type locality of *Leucetta primigenia* var. *microraphis* is, since Lendenfeld (1885) elevated it to the species category, Australia is considered as its type locality.

*Leucetta chagosensis* Dendy, 1913 (Figure S2)

*Leucetta chagosensis* (the “lemon sponge”) is bright yellow alive (Figure S2, G) and brown after fixation (Figure S2, A). It is massive and globose, but according to the original description, it can be encrusting. It has one to some few apical oscula surrounded by membrane. Surface is smooth but texture is friable. Subcortical cavities are present. The atrial cavity is reduced and the aquiferous system is leuconoid with sub-spherical choanocyetary chambers. The skeleton is composed mainly of small triactines, which are present everywhere, while colossal triactines are present only on the cortex and very rare small tetractines can be found only in the atrium.

## SPICULES

Small triactines (Figure S2, D): regular (equiradiate and equiangular). Actines are conical and sharp (100-172.3 ( $\pm 27.1$ )-210/ 10-17 ( $\pm 4.7$ )-20  $\mu\text{m}$ ), n=30 (Holotype, BMNH 1920.12.9.51).

Colossal triactines (Figure S2, E): regular (equiradiate and equiangular). Actines are conical and sharp (330-482.9 ( $\pm 102.3$ )-630/ 40-55.7 ( $\pm 14.8$ )-80  $\mu\text{m}$ ), n=8 (Holotype, BMNH 1920.12.9.51).

Small tetractines (Figure S2, F): regular (equiradiate and equiangular). Actines are conical and sharp (100-120.6 ( $\pm 22.1$ )-190/ 10-15 ( $\pm 3.5$ )-20  $\mu\text{m}$ ), n=25, Holotype. The apical actine is slightly thinner and much shorter than the basal ones (60-68.2 ( $\pm 8$ )-80/ 8-8.2 ( $\pm 0.4$ )-10  $\mu\text{m}$ ), n=4 (Holotype, BMNH 1920.12.9.51).

## HABITAT AND DISTRIBUTION

*Leucetta chagosensis* is a very abundant sponge both in protected and in illuminated areas. It was already reported to the Indian Ocean (Chagos Archipelago - type locality; Madagascar, Northern Red Sea, Japan (Okinawa), Indonesia, Australia (Queensland and Fremantle), New Caledonia and French Polynesia (Dendy, 1913; Wörheide & Hooper, 1999; 2008; Borojevic & Klautau, 2000). Phylogeographical studies showed, however, that populations of this species are highly structured and this wide distribution may be concealing cryptic species (Wörheide *et al.*, 2002; 2008).

**2. *Clathrina Minchin, 1900***

*Clathrina* is the most diverse genus of the family Clathrinidae Minchin, 1900. It comprises delicate clathroid species whose skeleton is composed only of triactines (Rossi *et al.*, 2011; Klautau *et al.*, 2013). It is a widespread genus, present in all oceans and latitudes, however, most of its species have a restricted distribution.

*Clathrina clathrus* (Schmidt, 1864) (Figure S3)

*Clathrina clathrus* is a yellow sponge (Figure S3, A) that becomes beige after fixation. It is a very common species in the Mediterranean and Adriatic Seas (Klautau & Valentine, 2003; Imesek *et al.*, 2014). Its body is formed by loosely anastomosed tubes and the few oscula are organised in water-collecting tubes. The aquiferous system is asconoid and the skeleton is composed only of triactines without organisation.

## SPICULES

Triactines (Figure S3, B): Regular (equiradiate and equiangular). Actines are cylindrical, undulated with rounded tips (85-92 ( $\pm 4.3$ )-100/ 7.3 ( $\pm 0.5$ )  $\mu\text{m}$ ), n=20, (Syntype, measurements from Klautau & Valentine, 2003).

## HABITAT AND DISTRIBUTION

*Clathrina clathrus* is a very delicate species that lives in light protected habitats, such as caves and crevices. It has already been considered as a cosmopolitan species, but currently its accepted distribution is restricted to the whole Mediterranean Sea and to the Northwestern coast of the Atlantic. In the past, all yellow clathrinids were identified as *C. clathrus*, however, a genetic study showed that Mediterranean and Southwestern Atlantic populations of yellow clathrinids were not conspecific (Solé-Cava *et al.*, 1991). Since then, molecular and morphological studies have proved the existence of several different species of yellow clathrinids in the world (Wörheide & Hooper, 1999; Borojevic & Klautau, 2000). However, all of them can be grouped in the same monophyletic clade (Rossi *et al.*, 2011; Klautau *et al.*, 2013).

### 3. Remarks

*Clathrina clathrus*, *L. microraphis* and *L. chagosensis* group within the subclass Calcinea, but the phylogenetic tree of Calcinea shows three main groups, one that reunites sponges without tetractines (*Clathrina*) and two of sponges with tetractines (all the other genera) (Rossi *et al.*, 2011; Klautau *et al.*, 2013) (Figure S5). *Clathrina clathrus* groups in the clade of *Clathrina*, more specifically in a clade of yellow clathrinins only. It is a sister group of *C. aurea* from the Western Atlantic (Brazil). *Leucetta microraphis* and *L. chagosensis* group in the clade of *Leucetta*, but separately from each other. *Leucetta microraphis* is more related to *L. potiguar* and *L. floridana* from the Western Atlantic, while *L. chagosensis* is more related to *L. pyriformis* and *L. antarctica*, both from Antarctica.

## SUPPLEMENTARY MATERIAL & METHODS

### DNA sequencing, alignment and phylogenetic analyses

The analysed region was the internal transcribed spacer (ITS), including 18S partial, ITS1, 5.8S, ITS2 and 28S partial. All sequences were obtained from the GenBank (Table S1). Sequences were aligned with the Q option of the MAFFT program (Kato & Standley, 2013), which takes into consideration the secondary structure of the ITS. Scoring matrix was PAM/k<sub>1/4</sub>2, gap penalty 1.53 and offser value <sub>1/4</sub>0. As an appropriate outgroup is not available, we root the tree with the mid-point rooting method. Final alignment contained 1,096 bp.

A maximum likelihood tree was generated using the MEGA 6.0 platform (Tamura *et al.*, 2013). The substitution model was the general time reversal (GTR). Partial deletion was chosen and 1,000 bootstrap pseudo-replicates (Felsenstein, 1985) were performed on the ML tree.

## SUPPLEMENTARY TABLES

**Supplementary Table S1.** Analyzed (molecular phylogeny) specimens with collection sites, voucher numbers and GenBank accession numbers.

| Species                          | Collection site          | Voucher number | GenBank (ITS) |
|----------------------------------|--------------------------|----------------|---------------|
| <i>Arturia cf. hirsuta</i>       | Cabo Verde               | ZMAPor07061    | KC843431      |
| <i>Ascaltis reticulum</i>        | Mediterranean Sea        | UFRJPor6258    | HQ588973      |
| <i>Ascandra contorta</i>         | Mediterranean Sea        | UFRJPor6327    | HQ588970      |
| <i>Ascandra corallicola</i>      | Norway                   | UFRJPor6329    | HQ588994      |
| <i>Ascandra falcata</i>          | Mediterranean Sea        | UFRJPor5856    | HQ588962      |
| <i>Borojevia aspina</i>          | Brazil                   | UFRJPor5245    | HQ588998      |
| <i>Borojevia brasiliensis</i>    | Brazil                   | UFRJPor5214    | HQ588978      |
| <i>Borojevia cerebrum</i>        | Mediterranean Sea        | UFRJPor6322    | HQ588964      |
| <i>Clathrina aurea</i>           | Brazil                   | MNRJ5170       | HQ588960      |
| <i>Clathrina aurea</i>           | Brazil                   | MNRJ8990       | HQ588958      |
| <i>Clathrina aurea</i>           | Brazil                   | MNRJ8998       | HQ588968      |
| <i>Clathrina clathrus</i>        | Mediterranean Sea        | UFRJPor6315    | HQ588974      |
| <i>Clathrina clathrus</i>        | Mediterranean Sea        | UFRJPor6325    | HQ588965      |
| <i>Clathrina clathrus</i>        | Mediterranean Sea        | UFRJPor6326    | HQ588972      |
| <i>Clathrina conifera</i>        | Brazil                   | MNRJ8991       | HQ588959      |
| <i>Clathrina conifera</i>        | Brazil                   | MNRJ8997       | HQ588957      |
| <i>Clathrina coriacea</i>        | Norway                   | UFRJPor6330    | HQ588986      |
| <i>Clathrina cylindractina</i>   | Brazil                   | UFRJPor 5413   | HQ588993      |
| <i>Clathrina fjordica</i>        | Chile                    | MNRJ 8143      | HQ588984      |
| <i>Clathrina luteoculcitella</i> | Australia                | QMG 313684     | HQ588989      |
| <i>Ernstia sp. nov. 1</i>        | Brazil                   | UFRJPor6621    | KC843433      |
| <i>Ernstia sp. nov. 14</i>       | Indonesia                | ZMAPor08390    | KC843451      |
| <i>Ernstia sp. nov. 2</i>        | Brazil                   | UFRJPor6617    | KC843434      |
| <i>Ernstia tetractina</i>        | Brazil                   | UFRJPor5183    | HQ589000      |
| <i>Leucascus simplex</i>         | French Polynesia, Moorea | BMOO16283      | KC843454      |
| <i>Leucetta antarctica</i>       | Antarctica               | MNRJ13798      | KC849700      |
| <i>Leucetta chagosensis</i>      | Australia                | QMG313774      | AM850505      |
| <i>Leucetta chagosensis</i>      | Australia                | QMG313944      | AM850528      |
| <i>Leucetta chagosensis</i>      | Australia                | QMG313946      | AM850529      |
| <i>Leucetta floridana</i>        | Caribbean                | UFRJPor5357    | EU781970      |
| <i>Leucetta floridana</i>        | Caribbean                | UFRJPor5359    | EU781969      |
| <i>Leucetta floridana</i>        | Caribbean                | UFRJPor5360    | EU781968      |
| <i>Leucetta microraphis</i>      | Australia, Wistari Reef  | QMG313659      | AJ633874      |
| <i>Leucetta microraphis</i>      | Australia, Wistari Reef  | QMG315140      | AJ633871      |
| <i>Leucetta potiguar</i>         | Brazil                   | UFPEPor547     | EU781986      |
| <i>Leucetta potiguar</i>         | Brazil                   | UFPEPor569     | EU781987      |
| <i>Leucetta potiguar</i>         | Brazil                   | UFPEPor588     | EU781988      |
| <i>Leucetta pyriformis</i>       | Antarctica               | MNRJ13843      | KC843457      |

**Supplementary Table S2.** Aminoimidazole alkaloids from marine invertebrates: natural products and total synthesis. All products are produced by marine sponges, except 13, 15, 41 (nudibranch) and 65, 66 (ascidian).

| #  | Product                                  | Species                                                | References                   | Total synthesis                                                                        |
|----|------------------------------------------|--------------------------------------------------------|------------------------------|----------------------------------------------------------------------------------------|
| 1  | Leucettidine                             | <i>Leucetta microraphis</i>                            | Cardellina et al. 1981       |                                                                                        |
| 2  | Naamine A                                | <i>Leucetta chagosensis</i><br><i>Leucetta avocado</i> | Carmely et al. 1987          |                                                                                        |
| 3  | Naamine B                                | <i>Leucetta chagosensis</i>                            | Carmely et al. 1989          |                                                                                        |
| 4  | Naamine C                                | <i>Leucetta chagosensis</i>                            | Fu et al. 1997               |                                                                                        |
| 5  | Naamine D                                | <i>Leucetta cf. chagosensis</i>                        | Dunbar et al. 2000           |                                                                                        |
| 6  | 5 N,N-Dimethyl naamine D                 | <i>Leucetta avocado</i>                                | Crews et al. 2003            |                                                                                        |
| 7  | Naamine E                                | <i>Leucetta chagosensis</i>                            | Gross et al. 2002            |                                                                                        |
| 8  | Naamine F                                | <i>Leucetta chagosensis</i>                            | Hassan et al. 2004           |                                                                                        |
| 9  | Naamine G                                | <i>Leucetta chagosensis</i>                            | Hassan et al. 2004           | Koswatta & Lovely, 2010a                                                               |
| 10 | Isonaamine A                             | <i>Leucetta chagosensis</i>                            | Carmely et al. 1987          | Molina et al. 1999; Ermolat'ev et al., 2008                                            |
| 11 | Isonaamine B                             | <i>Leucetta chagosensis</i>                            | Fu et al. 1998               |                                                                                        |
| 12 | Isonaamine C                             | <i>Leucetta chagosensis</i>                            | Gross et al. 2002            | Nakamura et al. 2003; Ermolat'ev et al. 2008; Lima et al., 2011                        |
| 13 | Dorimidazole A                           | <i>Notodoris gardineri</i>                             | Alvi et al. 1991             | Alvi et al. 1991; Molina et al. 1999                                                   |
| 14 | Dorimidazole B                           | <i>Leucetta chagosensis</i>                            | Hassan et al. 2009           | Zavesky et al. 2014                                                                    |
| 15 | Preclathridine A                         | <i>Notodoris gardineri</i>                             | Alvi et al. 1993             | Kawasaki et al. 1996; Molina et al. 1999; Koswatta & Lovely, 2009; Zavesky et al. 2014 |
| 16 | Preclathridine B                         | <i>Leucetta chagosensis</i>                            | Hassan et al. 2009           | Zavesky et al. 2014                                                                    |
| 17 | Leucettamine A                           | <i>Leucetta microraphis</i>                            | Chan et al. 1993             | Boehm et al. 1993                                                                      |
| 18 | Naamidine A                              | <i>Leucetta chagosensis</i>                            | Carmely et al. 1987, 1989    | Aberle et al. 2006; Gibbons et al. 2015                                                |
| 19 | Naamidine B                              | <i>Leucetta chagosensis</i>                            | Carmely et al. 1989          |                                                                                        |
| 20 | Naamidine C                              | <i>Leucetta chagosensis</i>                            | Carmely et al. 1989          |                                                                                        |
| 21 | Naamidine D                              | <i>Leucetta chagosensis</i>                            | Carmely et al. 1989          |                                                                                        |
| 22 | Naamidine E                              | <i>Leucetta sp.</i>                                    | Caroll et al. 1993           |                                                                                        |
| 23 | Naamidine F                              | <i>Leucetta sp.</i>                                    | Caroll et al. 1993           |                                                                                        |
| 24 | Naamidine G                              | <i>Leucetta sp.</i>                                    | Mancini et al. 1995          | Koswatta & Lovely, 2010b                                                               |
| 25 | Naamidine H                              | <i>Leucetta chagosensis</i>                            | Tsukamoto et al. 2007        | Koswatta & Lovely, 2010a                                                               |
| 26 | Naamidine I                              | <i>Leucetta chagosensis</i>                            | Tsukamoto et al. 2007        |                                                                                        |
| 27 | Pyronaamidine                            | <i>Leucetta sp.</i>                                    | Akee et al. 1990             |                                                                                        |
| 28 | (2E,9E)-pyronaamidine 9-(N-methylimine)  | <i>Leucetta sp. cf. chagosensis</i>                    | Plubrukarn et al. 1997       |                                                                                        |
| 29 | 14-hydroxynaamidine A                    | <i>Leucetta sp.</i>                                    | Mancini et al. 1995          |                                                                                        |
| 30 | 14-hydroxynaamidine G                    | <i>Leucetta sp.</i>                                    | Mancini et al. 1995          |                                                                                        |
| 31 | 14-methoxynaamidine A                    | <i>Leucetta sp.</i>                                    | Mancini et al. 1995          |                                                                                        |
| 32 | 14-methoxynaamidine G                    | <i>Leucetta sp.</i>                                    | Mancini et al. 1995          |                                                                                        |
| 33 | 14-oxonaamidine G                        | <i>Leucetta sp.</i>                                    | Mancini et al. 1995          |                                                                                        |
| 34 | Isonaamidine A                           | <i>Leucetta chagosensis</i>                            | Carmely et al. 1987, 1989    |                                                                                        |
| 35 | Isonaamidine B                           | <i>Leucetta chagosensis</i>                            | Carmely et al. 1989          |                                                                                        |
| 36 | Isonaamidine C                           | <i>Leucetta sp.</i>                                    | Copp et al. 1998             |                                                                                        |
| 37 | Isonaamidine D                           | <i>Leucetta cf. chagosensis</i>                        | Fu et al. 1998               |                                                                                        |
| 38 | Isonaamidine E                           | <i>Leucetta chagosensis</i>                            | Gross et al. 2002            | Lima et al. 2011                                                                       |
| 39 | Leucettamidine                           | <i>Leucetta microraphis</i>                            | Chan et al. 1993             |                                                                                        |
| 40 | Clathridrine A                           | <i>Clathrina clathrus</i>                              | Ciminiello et al. 1989       | Koswatta & Lovely, 2009                                                                |
| 41 | Clathridrine B                           | <i>Notodoris gardineri</i>                             | Alvi et al. 1993             |                                                                                        |
| 42 | Clathridrine C                           | <i>Leucetta sp.</i>                                    | Caroll et al. 1993           |                                                                                        |
| 43 | Clathridimine                            | <i>Clathrina clathrus</i>                              | Roué et al. 2010             |                                                                                        |
| 44 | (9E)-Clathridine-9-N-(2-sulfoethyl)imine | <i>Leucetta microraphis</i>                            | He et al. 1992               |                                                                                        |
| 45 | (Clathridine) <sub>2</sub> Zn            | <i>Clathrina clathrus</i>                              | Ciminiello et al. 1989, 1990 |                                                                                        |
| 46 | (Isonaamidine C) <sub>2</sub> Zn         | <i>Leucetta sp.</i>                                    | Alvi et al. 1993             |                                                                                        |
| 47 | Naamidine A+A                            | <i>Leucetta sp.</i>                                    | Mancini et al. 1995          |                                                                                        |
| 48 | Naamidine G+G                            | <i>Leucetta sp.</i>                                    | Mancini et al. 1995          |                                                                                        |
| 49 | Naamidine A+G                            | <i>Leucetta sp.</i>                                    | Mancini et al. 1995          |                                                                                        |



|    |                              |                                 |                                         |                                                                                          |
|----|------------------------------|---------------------------------|-----------------------------------------|------------------------------------------------------------------------------------------|
| 50 | Isonamidine B+B              | <i>Leucetta cf. chagosensis</i> | Fu et al. 1998                          |                                                                                          |
| 51 | Isonamidine B+D              | <i>Leucetta cf. chagosensis</i> | Fu et al. 1998                          |                                                                                          |
| 52 | Kealiiquinone                | <i>Leucetta sp.</i>             | Akee et al. 1990                        | Das et al. 2013                                                                          |
| 53 | 2-deoxy-2-aminokealiiquinone | <i>Leucetta chagosensis</i>     | Fu et al. 1997                          | Das et al. 2013                                                                          |
| 54 | Spirocalcaridine A           | <i>Leucetta sp.</i>             | Edrada et al. 2003                      |                                                                                          |
| 55 | Spirocalcaridine B           | <i>Leucetta sp.</i>             | Edrada et al. 2003                      |                                                                                          |
| 56 | Kealiinine A                 | <i>Leucetta chagosensis</i>     | Hassan et al. 2004                      | Das et al. 2012                                                                          |
| 57 | Kealiinine B                 | <i>Leucetta chagosensis</i>     | Hassan et al. 2004                      | Das et al. 2012; Gibbons et al. 2012                                                     |
| 58 | Kealiinine C                 | <i>Leucetta chagosensis</i>     | Hassan et al. 2004                      | Das et al. 2012; Gibbons et al. 2012                                                     |
| 59 | Leucettamine B               | <i>Leucetta microraphis</i>     | Chan et al. 1993                        | Roué & Bergman, 1999; Chérouvrier et al. 2002; Debdab et al. 2009; Selvaraju & Sun, 2015 |
| 60 | Leucettamine C               | <i>Leucetta avocado</i>         | Crews et al. 2003                       |                                                                                          |
| 61 | Calcaridine A                | <i>Leucetta sp.</i>             | Edrada et al. 2003                      | Koswatta et al. 2008                                                                     |
| 62 | Spiroleucettadine            | <i>Leucetta sp.</i>             | Ralifo & Crews, 2004; White et al. 2008 | Aberle et al. 2007                                                                       |
| 63 | Phorbatopsin A               | <i>Phorbas topsenti</i>         | Nguyen et al. 2012                      | Ling et al. 2013                                                                         |
| 64 | Phorbatopsin B               | <i>Phorbas topsenti</i>         | Nguyen et al. 2012                      |                                                                                          |
| 65 | Phorbatopsin C               | <i>Phorbas topsenti</i>         | Nguyen et al. 2012                      |                                                                                          |
| 66 | Polyandrocarpamine A         | <i>Polyandrocarpa sp.</i>       | Davis et al. 2002                       | Davis et al. 2008                                                                        |
| 67 | Polyandrocarpamine B         | <i>Polyandrocarpa sp.</i>       | Davis et al. 2002                       | Davis et al. 2008                                                                        |
| 68 | Leucosolenamine A            | <i>Leucosolenia sp.</i>         | Ralifo et al. 2007                      |                                                                                          |
| 69 | Leucosolenamine B            | <i>Leucosolenia sp.</i>         | Ralifo et al. 2007                      |                                                                                          |

**Supplementary Table S3. Kinase orthologues from unicellular parasites cloned, expressed and tested in this study.** *Pf*, *Plasmodium falciparum*; *Lm*, *Leishmania major*. *Ld*, *Leishmania donovani*; *Tb*, *Trypanosoma brucei*; *Tc*, *Trypanosoma cruzi*; *Cp*, *Cryptosporidium parvum*; *Gl*, *Giardia lamblia*; *Tg*, *Toxoplasma gondii*.

| Kinase            | Parasite                      | Protein accession number |
|-------------------|-------------------------------|--------------------------|
| LmCCK1.2          | <i>Leishmania major</i>       | XP_003722496.1           |
| LmDYRK2           | <i>Leishmania major</i>       | XP_001685943.1           |
| LmCLK             | <i>Leishmania major</i>       | XP_001681214.1           |
| LdDYRK3           | <i>Leishmania donovani</i>    | XP_003864768.1           |
| LdDYRK4           | <i>Leishmania donovani</i>    | XP_003860718.1           |
| LdDYRK1B          | <i>Leishmania donovani</i>    | XP_003859543.1           |
| TbCLK1            | <i>Trypanosoma brucei</i>     | XP_829303.1              |
| TcCLK1            | <i>Trypanosoma cruzi</i>      | XP_821361.1              |
| PfGSK-3           | <i>Plasmodium falciparum</i>  | XP_001351197.1           |
| PfCLK1 (PfLAMMER) | <i>Plasmodium falciparum</i>  | XP_001348605.1           |
| CpLAMMER          | <i>Cryptosporidium parvum</i> | XP_001388249.1           |
| GlCLK             | <i>Giardia lamblia</i>        | XP_001708093.1           |
| TgCLK             | <i>Toxoplasma gondii</i>      | EEE24592.1               |

**Supplementary Table S4. DiscoverX KinomeScan® Kinase Selectivity Panel (442 kinases).**

Enzymes were prepared and interactions assays were run in the presence of 1  $\mu$ M polyandrocarpamine A, as described in Karaman et al. (2008). A semi-quantitative scoring of this primary screen was estimated. This score relates to a probability of a hit rather than strict affinity. Scores > 10, between 1 - 10 and < 1 indicate the probability of being a false positive is < 20 %, < 10 %, < 5 %, respectively. Scores  $\leq$ 10 are underlined in green.

| Kinase                        | Score |               |     |
|-------------------------------|-------|---------------|-----|
| AAK1                          | 100   | BIKE          | 70  |
| ABL1(E255K)-phosphorylated    | 100   | BLK           | 100 |
| ABL1(F317I)-nonphosphorylated | 92    | BMPR1A        | 100 |
| ABL1(F317I)-phosphorylated    | 86    | BMPR1B        | 42  |
| ABL1(F317L)-nonphosphorylated | 100   | BMPR2         | 95  |
| ABL1(F317L)-phosphorylated    | 98    | BMX           | 100 |
| ABL1(H396P)-nonphosphorylated | 95    | BRAF          | 100 |
| ABL1(H396P)-phosphorylated    | 100   | BRAF(V600E)   | 96  |
| ABL1(M351T)-phosphorylated    | 100   | BRK           | 100 |
| ABL1(Q252H)-nonphosphorylated | 100   | BRSK1         | 100 |
| ABL1(Q252H)-phosphorylated    | 100   | BRSK2         | 100 |
| ABL1(T315I)-nonphosphorylated | 67    | BTK           | 100 |
| ABL1(T315I)-phosphorylated    | 85    | CAMK1         | 100 |
| ABL1(Y253F)-phosphorylated    | 100   | CAMK1D        | 100 |
| ABL1-nonphosphorylated        | 90    | CAMK1G        | 100 |
| ABL1-phosphorylated           | 100   | CAMK2A        | 98  |
| ABL2                          | 87    | CAMK2B        | 90  |
| ACVR1                         | 100   | CAMK2D        | 100 |
| ACVR1B                        | 81    | CAMK2G        | 99  |
| ACVR2A                        | 100   | CAMK4         | 94  |
| ACVR2B                        | 99    | CAMKK1        | 100 |
| ACVRL1                        | 100   | CAMKK2        | 94  |
| ADCK3                         | 100   | CASK          | 100 |
| ADCK4                         | 98    | CDC2L1        | 100 |
| AKT1                          | 100   | CDC2L2        | 100 |
| AKT2                          | 100   | CDC2L5        | 100 |
| AKT3                          | 100   | CDK11         | 100 |
| ALK                           | 100   | CDK2          | 91  |
| AMPK-alpha1                   | 100   | CDK3          | 100 |
| AMPK-alpha2                   | 87    | CDK4-cyclinD1 | 96  |
| ANKK1                         | 100   | CDK4-cyclinD3 | 98  |
| ARK5                          | 71    | CDK5          | 100 |
| ASK1                          | 100   | CDK7          | 100 |
| ASK2                          | 100   | CDK8          | 100 |
| AURKA                         | 100   | CDK9          | 88  |
| AURKB                         | 100   | CDKL1         | 100 |
| AURKC                         | 99    | CDKL2         | 100 |
| AXL                           | 100   | CDKL3         | 100 |
|                               |       | CDKL5         | 100 |
|                               |       | CHEK1         | 100 |
|                               |       | CHEK2         | 100 |
|                               |       | CIT           | 100 |
|                               |       | CLK1          | 32  |
|                               |       | CLK2          | 45  |



|                           |          |                       |     |
|---------------------------|----------|-----------------------|-----|
| CLK3                      | 69       | EPHB1                 | 89  |
| CLK4                      | 30       | EPHB2                 | 79  |
| CSF1R                     | 87       | EPHB3                 | 100 |
| CSK                       | 100      | EPHB4                 | 100 |
| CSNK1A1                   | 100      | EPHB6                 | 97  |
| CSNK1A1L                  | 100      | ERBB2                 | 100 |
| CSNK1D                    | 70       | ERBB3                 | 100 |
| CSNK1E                    | 87       | ERBB4                 | 99  |
| CSNK1G1                   | 100      | ERK1                  | 100 |
| CSNK1G2                   | 100      | ERK2                  | 100 |
| CSNK1G3                   | 84       | ERK3                  | 82  |
| CSNK2A1                   | 12       | ERK4                  | 100 |
| CSNK2A2                   | 26       | ERK5                  | 100 |
| CTK                       | 100      | ERK8                  | 67  |
| DAPK1                     | 79       | ERN1                  | 100 |
| DAPK2                     | 58       | FAK                   | 94  |
| DAPK3                     | 50       | FER                   | 100 |
| DCAMKL1                   | 98       | FES                   | 96  |
| DCAMKL2                   | 100      | FGFR1                 | 100 |
| DCAMKL3                   | 94       | FGFR2                 | 100 |
| DDR1                      | 100      | FGFR3                 | 100 |
| DDR2                      | 69       | FGFR3(G697C)          | 83  |
| DLK                       | 100      | FGFR4                 | 98  |
| DMPK                      | 100      | FGR                   | 100 |
| DMPK2                     | 99       | FLT1                  | 100 |
| DRAK1                     | 42       | FLT3                  | 100 |
| DRAK2                     | 51       | FLT3(D835H)           | 94  |
| <b>DYRK1A</b>             | <b>3</b> | FLT3(D835Y)           | 100 |
| DYRK1B                    | 25       | FLT3(ITD)             | 100 |
| DYRK2                     | 24       | FLT3(K663Q)           | 100 |
| EGFR                      | 99       | FLT3(N841I)           | 100 |
| EGFR(E746-A750del)        | 100      | FLT3(R834Q)           | 100 |
| EGFR(G719C)               | 95       | FLT4                  | 100 |
| EGFR(G719S)               | 100      | FRK                   | 100 |
| EGFR(L747-E749del, A750P) | 100      | FYN                   | 100 |
| EGFR(L747-S752del, P753S) | 100      | GAK                   | 100 |
| EGFR(L747-T751del,Sins)   | 92       | GCN2(Kin.Dom.2,S808G) | 90  |
| EGFR(L858R)               | 93       | GRK1                  | 100 |
| EGFR(L858R,T790M)         | 100      | GRK4                  | 100 |
| EGFR(L861Q)               | 100      | GRK7                  | 100 |
| EGFR(S752-I759del)        | 100      | GSK3A                 | 100 |
| EGFR(T790M)               | 93       | GSK3B                 | 100 |
| EIF2AK1                   | 100      | HCK                   | 100 |
| EPHA1                     | 100      | HIPK1                 | 52  |
| EPHA2                     | 100      | HIPK2                 | 50  |
| EPHA3                     | 87       | HIPK3                 | 19  |
| EPHA4                     | 83       | HIPK4                 | 85  |
| EPHA5                     | 100      | HPK1                  | 100 |
| EPHA6                     | 100      | HUNK                  | 100 |
| EPHA7                     | 100      | ICK                   | 100 |
| EPHA8                     | 100      | IGF1R                 | 100 |

|                              |     |             |     |
|------------------------------|-----|-------------|-----|
| IKK-alpha                    | 100 | MARK3       | 100 |
| IKK-beta                     | 100 | MARK4       | 100 |
| IKK-epsilon                  | 89  | MAST1       | 100 |
| INSR                         | 90  | MEK1        | 100 |
| INSRR                        | 81  | MEK2        | 100 |
| IRAK1                        | 28  | MEK3        | 98  |
| IRAK3                        | 98  | MEK4        | 100 |
| IRAK4                        | 46  | MEK5        | 78  |
| ITK                          | 94  | MEK6        | 100 |
| JAK1(JH1domain-catalytic)    | 72  | MELK        | 100 |
| JAK1(JH2domain-pseudokinase) | 92  | MERTK       | 100 |
| JAK2(JH1domain-catalytic)    | 97  | MET         | 100 |
| JAK3(JH1domain-catalytic)    | 84  | MET(M1250T) | 97  |
| JNK1                         | 100 | MET(Y1235D) | 100 |
| JNK2                         | 100 | MINK        | 100 |
| JNK3                         | 93  | MKK7        | 89  |
| KIT                          | 87  | MKNK1       | 63  |
| KIT(A829P)                   | 91  | MKNK2       | 100 |
| KIT(D816H)                   | 100 | MLCK        | 100 |
| KIT(D816V)                   | 100 | MLK1        | 100 |
| KIT(L576P)                   | 99  | MLK2        | 100 |
| KIT(V559D)                   | 91  | MLK3        | 100 |
| KIT(V559D,T670I)             | 85  | MRCKA       | 100 |
| KIT(V559D,V654A)             | 100 | MRCKB       | 100 |
| LATS1                        | 100 | MST1        | 70  |
| LATS2                        | 100 | MST1R       | 100 |
| LCK                          | 100 | MST2        | 100 |
| LIMK1                        | 100 | MST3        | 100 |
| LIMK2                        | 96  | MST4        | 100 |
| LKB1                         | 100 | MTOR        | 84  |
| LOK                          | 100 | MUSK        | 56  |
| LRRK2                        | 100 | MYLK        | 98  |
| LRRK2(G2019S)                | 100 | MYLK2       | 95  |
| LTK                          | 100 | MYLK4       | 96  |
| LYN                          | 89  | MYO3A       | 100 |
| LZK                          | 100 | MYO3B       | 88  |
| MAK                          | 91  | NDR1        | 100 |
| MAP3K1                       | 100 | NDR2        | 91  |
| MAP3K15                      | 100 | NEK1        | 100 |
| MAP3K2                       | 100 | NEK11       | 100 |
| MAP3K3                       | 100 | NEK2        | 100 |
| MAP3K4                       | 100 | NEK3        | 100 |
| MAP4K2                       | 97  | NEK4        | 100 |
| MAP4K3                       | 78  | NEK5        | 95  |
| MAP4K4                       | 98  | NEK6        | 100 |
| MAP4K5                       | 100 | NEK7        | 100 |
| MAPKAPK2                     | 100 | NEK9        | 100 |
| MAPKAPK5                     | 100 | NIM1        | 100 |
| MARK1                        | 100 | NLK         | 100 |
| MARK2                        | 100 | OSR1        | 100 |
|                              |     | p38-alpha   | 100 |

|                       |     |                               |     |
|-----------------------|-----|-------------------------------|-----|
| p38-beta              | 81  | PLK2                          | 100 |
| p38-delta             | 100 | PLK3                          | 100 |
| p38-gamma             | 100 | PLK4                          | 100 |
| PAK1                  | 100 | PRKCD                         | 100 |
| PAK2                  | 70  | PRKCE                         | 100 |
| PAK3                  | 100 | PRKCH                         | 77  |
| PAK4                  | 100 | PRKCI                         | 100 |
| PAK6                  | 100 | PRKCCQ                        | 100 |
| PAK7                  | 79  | PRKD1                         | 91  |
| PCK1                  | 100 | PRKD2                         | 92  |
| PCK2                  | 100 | PRKD3                         | 98  |
| PCK3                  | 100 | PRKG1                         | 100 |
| PDGFRA                | 100 | PRKG2                         | 93  |
| PDGFRB                | 94  | PRKR                          | 98  |
| PDPK1                 | 100 | PRKX                          | 90  |
| PFCDPK1(P.falciparum) | 100 | PRP4                          | 100 |
| PFPK5(P.falciparum)   | 100 | PYK2                          | 100 |
| PFTAIRE2              | 100 | QSK                           | 100 |
| PFTK1                 | 100 | RAF1                          | 100 |
| PHKG1                 | 100 | RET                           | 100 |
| PHKG2                 | 85  | RET(M918T)                    | 100 |
| PIK3C2B               | 100 | RET(V804L)                    | 100 |
| PIK3C2G               | 84  | RET(V804M)                    | 100 |
| PIK3CA                | 100 | RIOK1                         | 100 |
| PIK3CA(C420R)         | 100 | RIOK2                         | 100 |
| PIK3CA(E542K)         | 100 | RIOK3                         | 93  |
| PIK3CA(E545A)         | 88  | RIPK1                         | 100 |
| PIK3CA(E545K)         | 100 | RIPK2                         | 99  |
| PIK3CA(H1047L)        | 100 | RIPK4                         | 100 |
| PIK3CA(H1047Y)        | 100 | RIPK5                         | 83  |
| PIK3CA(I800L)         | 99  | ROCK1                         | 71  |
| PIK3CA(M1043I)        | 93  | ROCK2                         | 93  |
| PIK3CA(Q546K)         | 81  | ROS1                          | 100 |
| PIK3CB                | 100 | RPS6KA4(Kin.Dom.1-N-terminal) | 100 |
| PIK3CD                | 100 | RPS6KA4(Kin.Dom.2-C-terminal) | 22  |
| PIK3CG                | 100 | RPS6KA5(Kin.Dom.1-N-terminal) | 100 |
| PIK4CB                | 100 | RPS6KA5(Kin.Dom.2-C-terminal) | 73  |
| PIM1                  | 68  | RSK1(Kin.Dom.1-N-terminal)    | 81  |
| PIM2                  | 21  | RSK1(Kin.Dom.2-C-terminal)    | 100 |
| PIM3                  | 38  | RSK2(Kin.Dom.1-N-terminal)    | 92  |
| PIP5K1A               | 88  | RSK3(Kin.Dom.1-N-terminal)    | 94  |
| PIP5K1C               | 100 | RSK3(Kin.Dom.2-C-terminal)    | 100 |
| PIP5K2B               | 100 | RSK4(Kin.Dom.1-N-terminal)    | 100 |
| PIP5K2C               | 100 | RSK4(Kin.Dom.2-C-terminal)    | 94  |
| PKAC-alpha            | 100 | S6K1                          | 100 |
| PKAC-beta             | 100 | SBK1                          | 100 |
| PKMYT1                | 100 | SgK110                        | 100 |
| PKN1                  | 100 |                               |     |
| PKN2                  | 100 |                               |     |
| PKNB(M.tuberculosis)  | 75  |                               |     |
| PLK1                  | 96  |                               |     |

|        |     |
|--------|-----|
| SGK3   | 100 |
| SIK    | 100 |
| SIK2   | 94  |
| SLK    | 100 |
| SNARK  | 100 |
| SNRK   | 100 |
| SRC    | 100 |
| SRMS   | 100 |
| SRPK1  | 100 |
| SRPK2  | 100 |
| SRPK3  | 100 |
| STK16  | 100 |
| STK33  | 100 |
| STK35  | 95  |
| STK36  | 96  |
| STK39  | 100 |
| SYK    | 100 |
| TAK1   | 100 |
| TAOK1  | 76  |
| TAOK2  | 100 |
| TAOK3  | 87  |
| TBK1   | 100 |
| TEC    | 98  |
| TESK1  | 100 |
| TGFBR1 | 100 |
| TGFBR2 | 100 |
| TIE1   | 81  |
| TIE2   | 98  |
| TLK1   | 94  |
| TLK2   | 100 |

|                              |     |
|------------------------------|-----|
| TNIK                         | 100 |
| TNK1                         | 100 |
| TNK2                         | 100 |
| TNNI3K                       | 98  |
| TRKA                         | 95  |
| TRKB                         | 100 |
| TRKC                         | 82  |
| TRPM6                        | 100 |
| TSSK1B                       | 100 |
| TTK                          | 100 |
| TXK                          | 100 |
| TYK2(JH1domain-catalytic)    | 100 |
| TYK2(JH2domain-pseudokinase) | 100 |
| TYRO3                        | 100 |
| ULK1                         | 94  |
| ULK2                         | 100 |
| ULK3                         | 100 |
| VEGFR2                       | 100 |
| VRK2                         | 100 |
| WEE1                         | 100 |
| WEE2                         | 100 |
| YANK1                        | 100 |
| YANK2                        | 94  |
| YANK3                        | 100 |
| YES                          | 100 |
| YSK1                         | 100 |
| YSK4                         | 100 |
| ZAK                          | 95  |
| ZAP70                        | 100 |

## SUPPLEMENTARY FIGURES

**Supplementary Figure S1.** *Leucetta microraphis* (syntype PMJ 133). **A.** Sponge after fixation. **B.** Tangential section of the cortex. **C.** Tangential section of the atrium. **D.** Small triactine. **E.** Colossal triactine. **F.** Small tetractine. **G.** Sponge *in vivo* (not the syntype - photo by A. Padua).

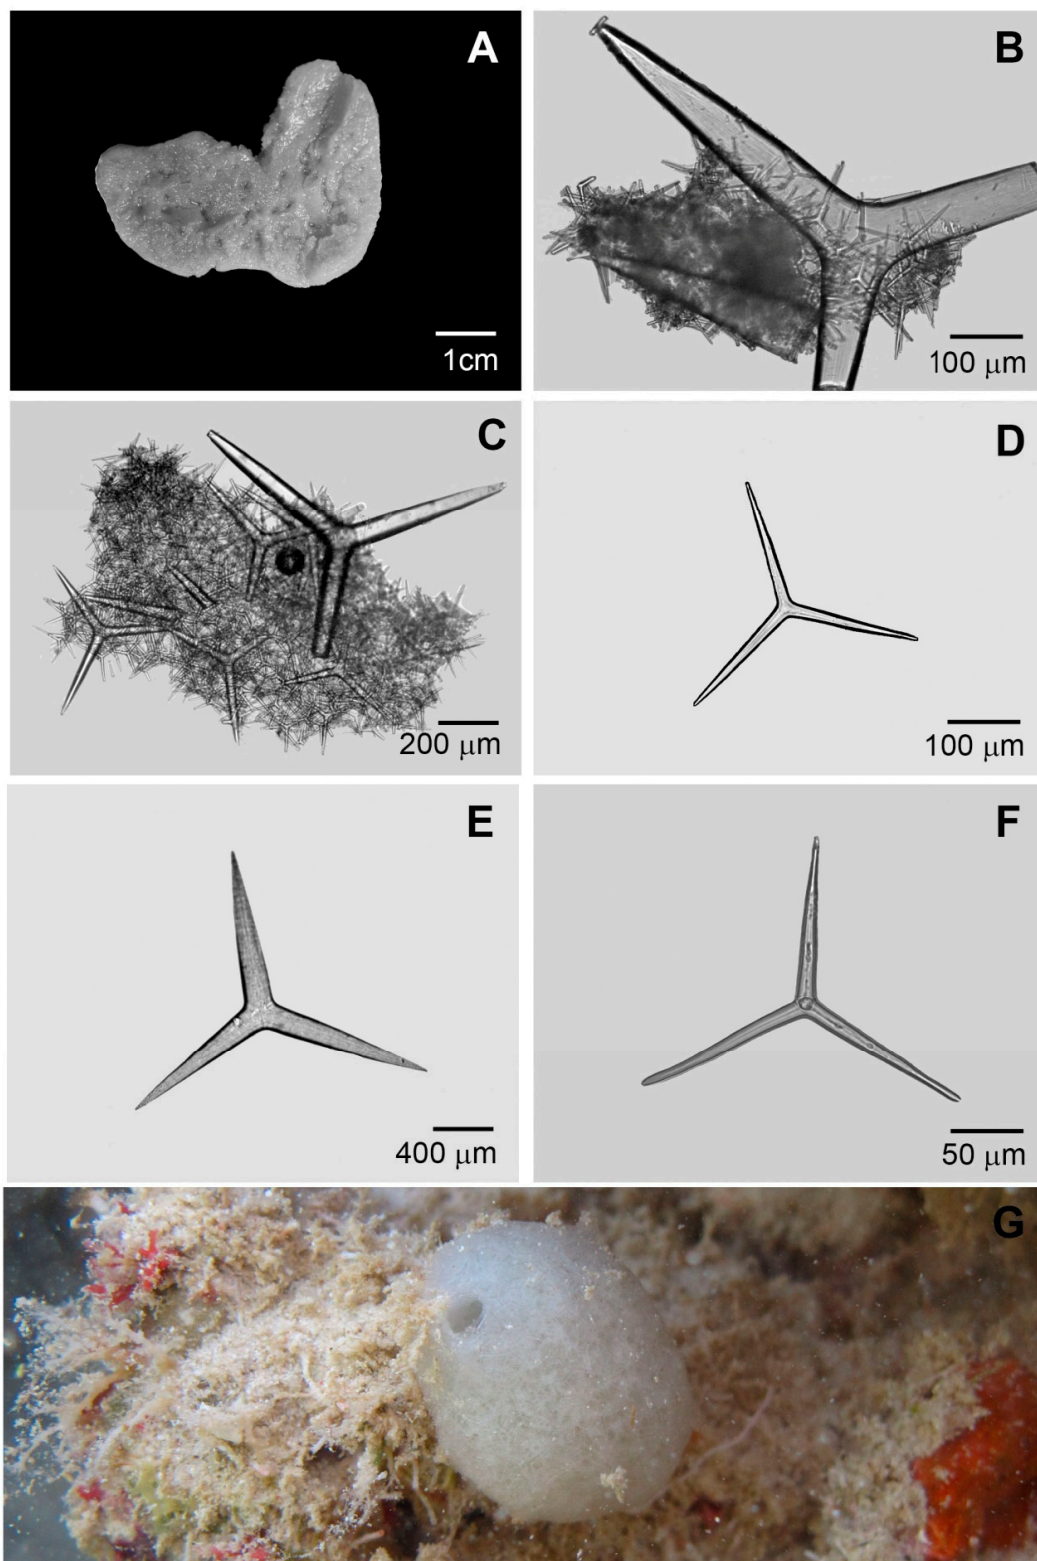



**Supplementary Figure S2.** *Leucetta chagosensis* (holotype BMNH 1920.12.9.51). **A.** Sponge after fixation. **B.** Tangential section of the cortex. **C.** Tangential section of the atrium. **D.** Small triactine. **E.** Colossal triactine. **F.** Small tetractine. **G.** Sponge *in vivo* (not the holotype - photo by A. Padua)

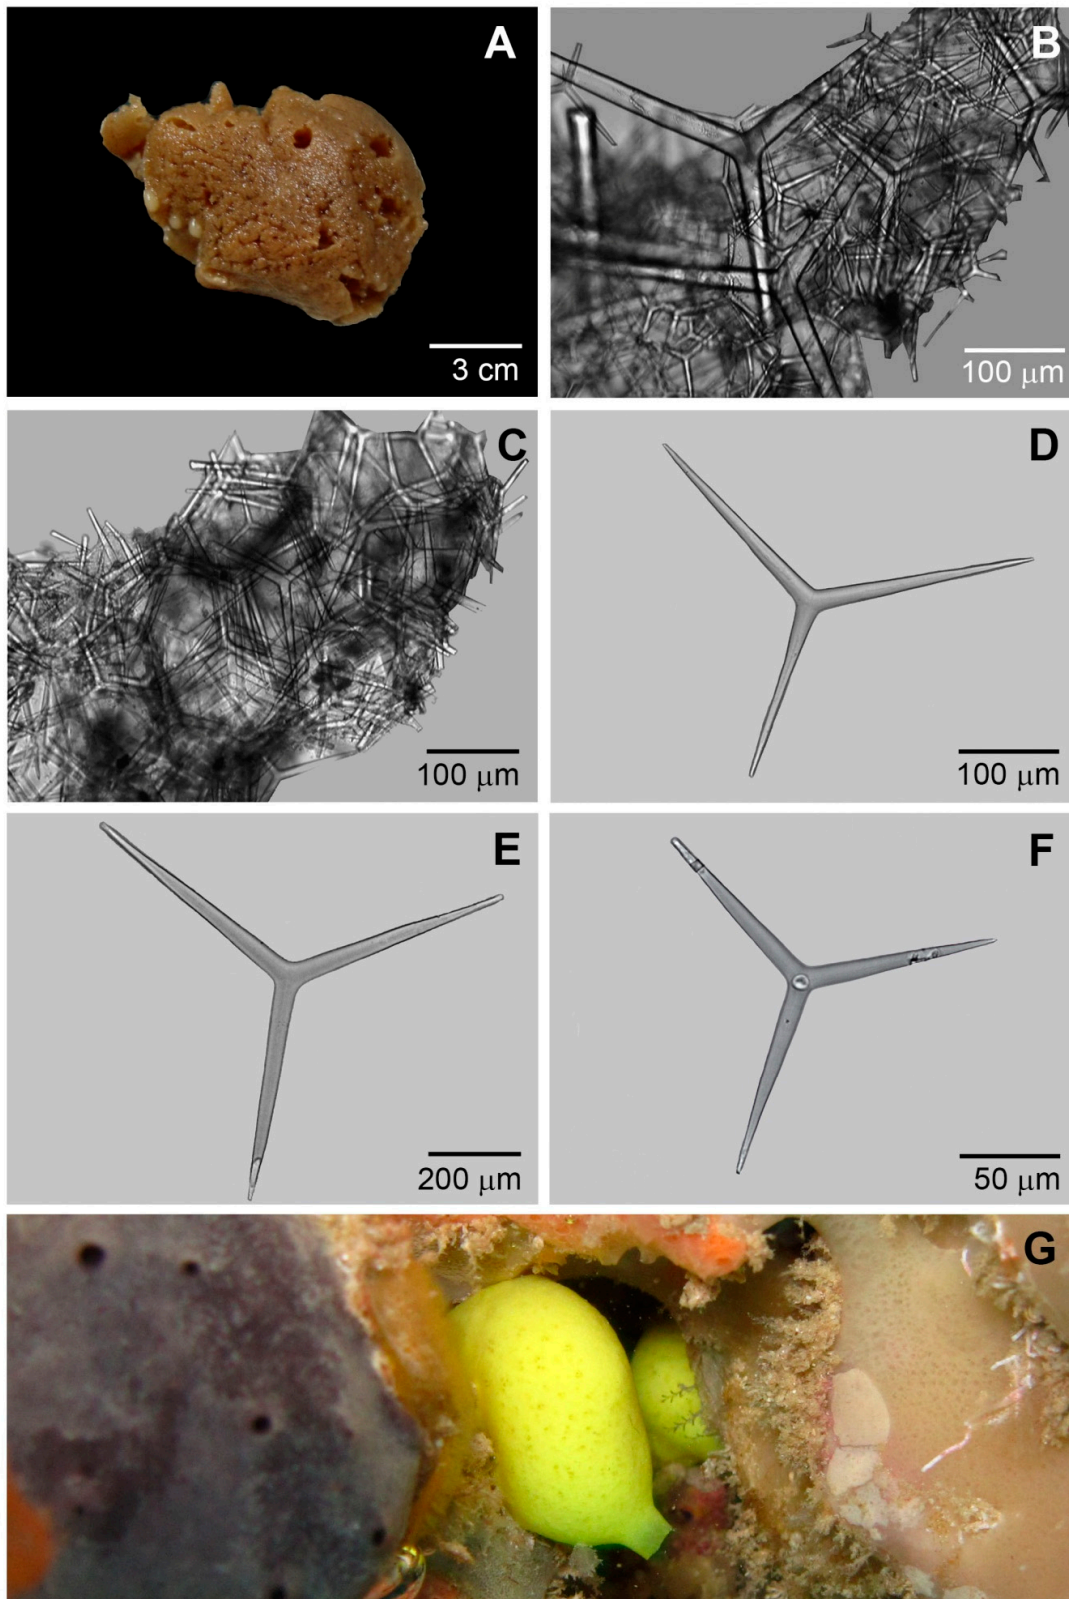



**Supplementary Figure S3.** *Clathrina clathrus*. **A.** Sponge *in vivo* (photo by J. Vacelet). **B.** Triactine.

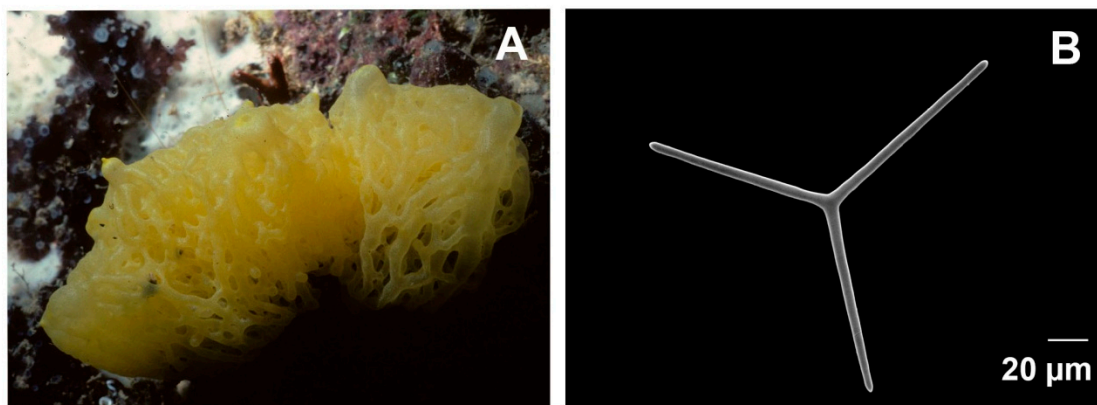

**Supplementary Figure S4.** Maximum likelihood tree of the nuclear ITS marker of Clathrinida species (subclass Calcinea).

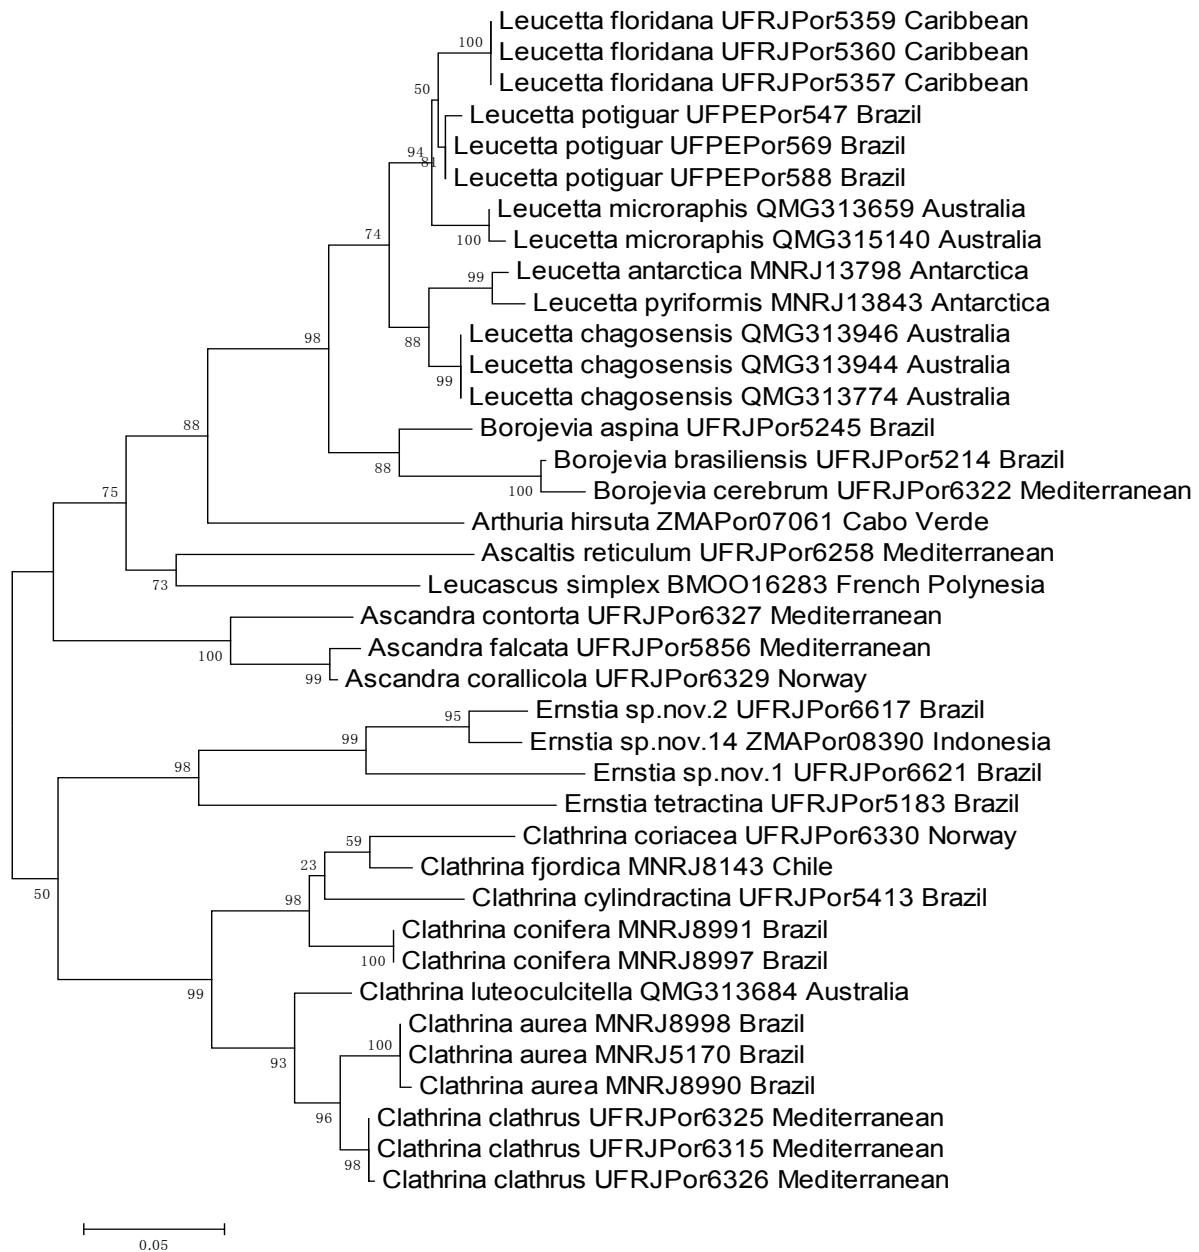

**Supplementary Figure S5.** Structure of aminoimidazole alkaloids from calcareous sponges and a few other invertebrates. Organized according to the classification of Roué et al. (2012).

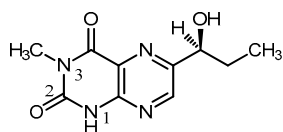

## 1 Leucettidine

### Category I. 2-Aminoimidazole alkaloids

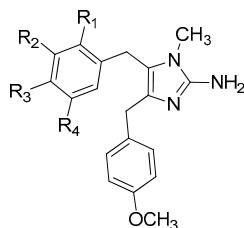

|          |                  | R <sub>1</sub> | R <sub>2</sub> | R <sub>3</sub> | R <sub>4</sub> |
|----------|------------------|----------------|----------------|----------------|----------------|
| <b>2</b> | <b>Naamine A</b> | H              | H              | OH             | H              |
| <b>4</b> | <b>Naamine C</b> | OH             | OMe            | OMe            | H              |
| <b>7</b> | <b>Naamine E</b> | H              | OH             | OMe            | OH             |
| <b>8</b> | <b>Naamine F</b> | H              | OMe            | OH             | H              |
| <b>9</b> | <b>Naamine G</b> | H              | OMe            | OH             | OMe            |

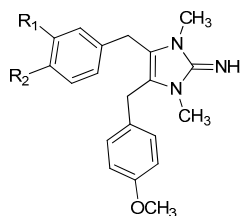

|          |                                 | R <sub>1</sub> | R <sub>2</sub> |
|----------|---------------------------------|----------------|----------------|
| <b>3</b> | <b>Naamine B</b>                | OH             | OMe            |
| <b>6</b> | <b>5,N,N-Dimethyl naamine D</b> | H              | OMe            |

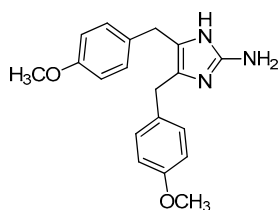

## 5 Naamine D

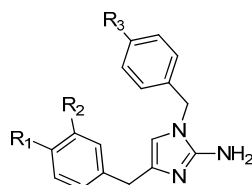

|           |                     | R <sub>1</sub> | R <sub>2</sub> | R <sub>3</sub> |
|-----------|---------------------|----------------|----------------|----------------|
| <b>10</b> | <b>Isonaamine A</b> | OH             | H              | OH             |
| <b>12</b> | <b>Isonaamine C</b> | OMe            | OMe            | OMe            |

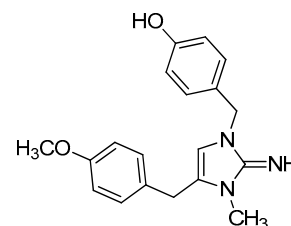

## 11 Isonaamine B

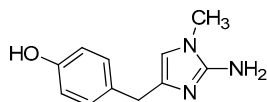

## 13 Dorimidazole A

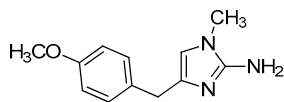

## 14 Dorimidazole B

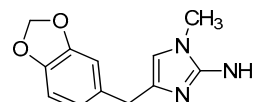

## 15 Preclatridrine A

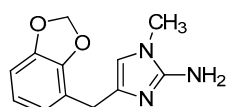

## 16 Preclathridine B

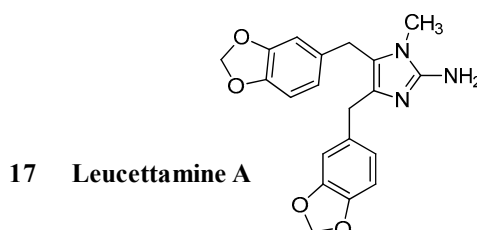

## 17 Leucettamine A

**Category II. 2-Aminoimidazole alkaloids functionalized on the 2-amino group.**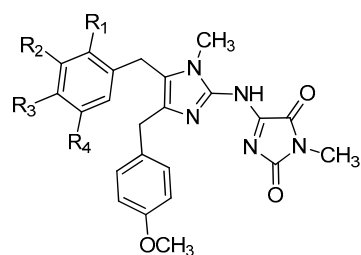

|    |               | R <sub>1</sub> | R <sub>2</sub> | R <sub>3</sub> | R <sub>4</sub> |
|----|---------------|----------------|----------------|----------------|----------------|
| 18 | Naamidine A   | H              | H              | OH             | H              |
| 19 | Naamidine B   | H              | OH             | OMe            | H              |
| 22 | Naamidine E   | OH             | OMe            | OMe            | OH             |
| 24 | Naamidine G   | H              | H              | OMe            | H              |
| 25 | Naamidine H   | H              | OMe            | OH             | OMe            |
| 27 | Pyronaamidine | OH             | OMe            | OMe            | H              |

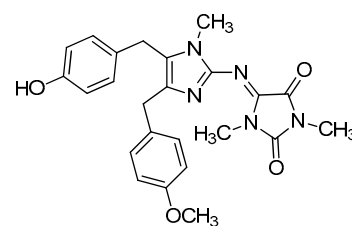**20 Naamidine C**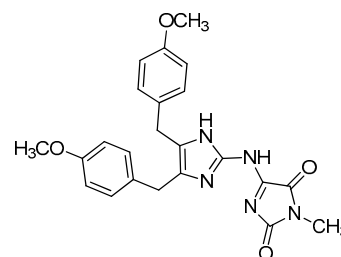**21 Naamidine D**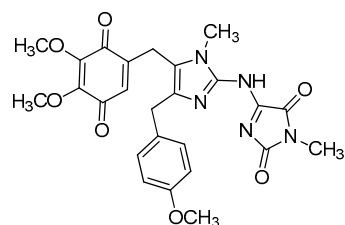**23 Naamidine F**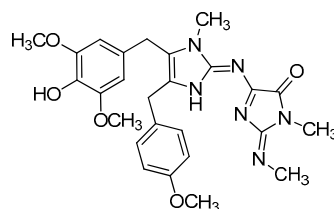**26 Naamidine I**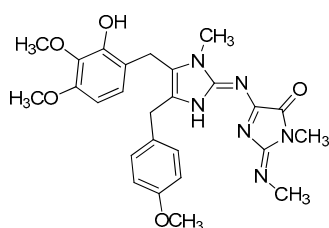**28 (2E,9E)-pyronaamidine 9-(N-methylimine)**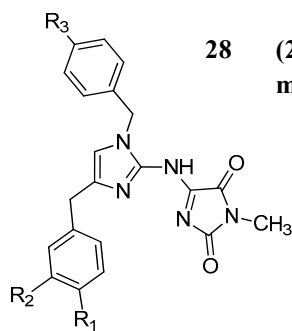

|    |                | R <sub>1</sub> | R <sub>2</sub> | R <sub>3</sub> |
|----|----------------|----------------|----------------|----------------|
| 34 | Isonaamidine A | OH             | H              | OH             |
| 35 | Isonaamidine B | OMe            | H              | OH             |
| 36 | Isonaamidine C | OMe            | H              | OMe            |
| 38 | Isonaamidine E | OMe            | OMe            | OMe            |

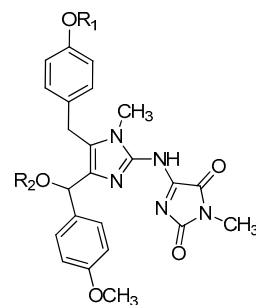

|    |                        | R <sub>1</sub> | R <sub>2</sub> |
|----|------------------------|----------------|----------------|
| 29 | 14-hydroxy naamidine A | H              | H              |
| 30 | 14-hydroxy naamidine G | Me             | H              |
| 31 | 14-methoxy naamidine A | H              | Me             |

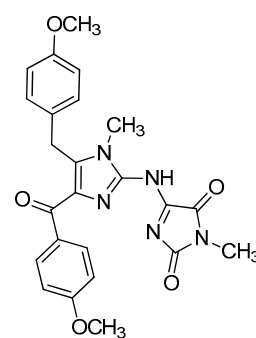**33 14-oxonaamidine G**

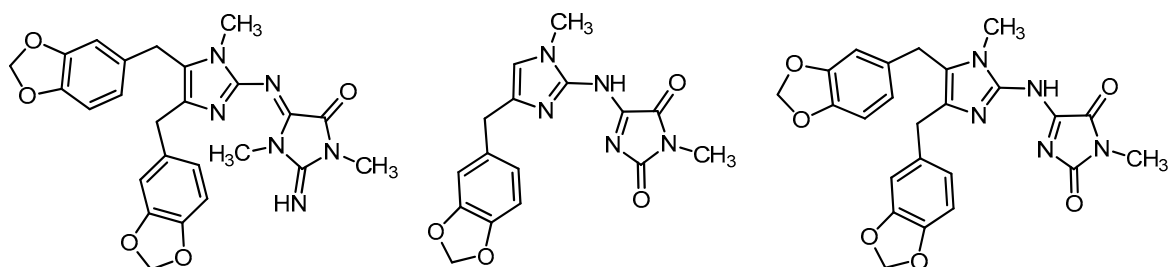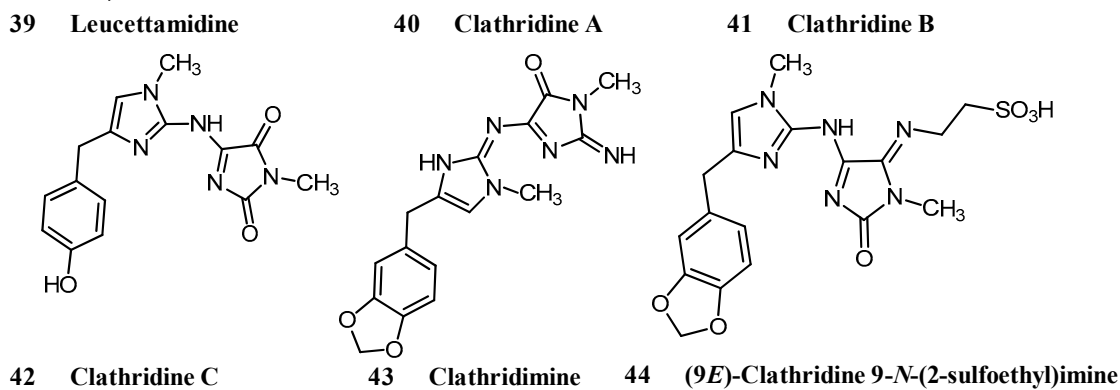

Zinc complexes

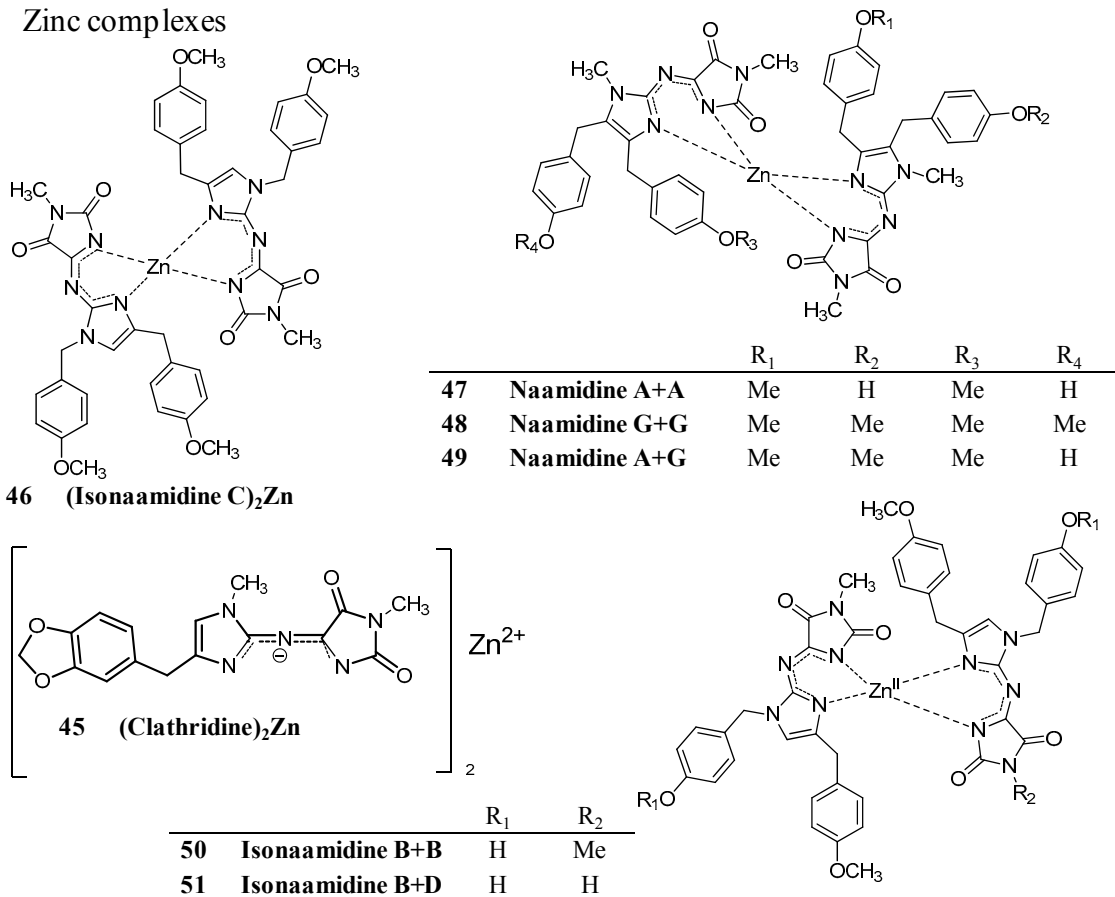

**Category III . 2-Aminoimidazole alkaloids fused in a tetracyclic system.**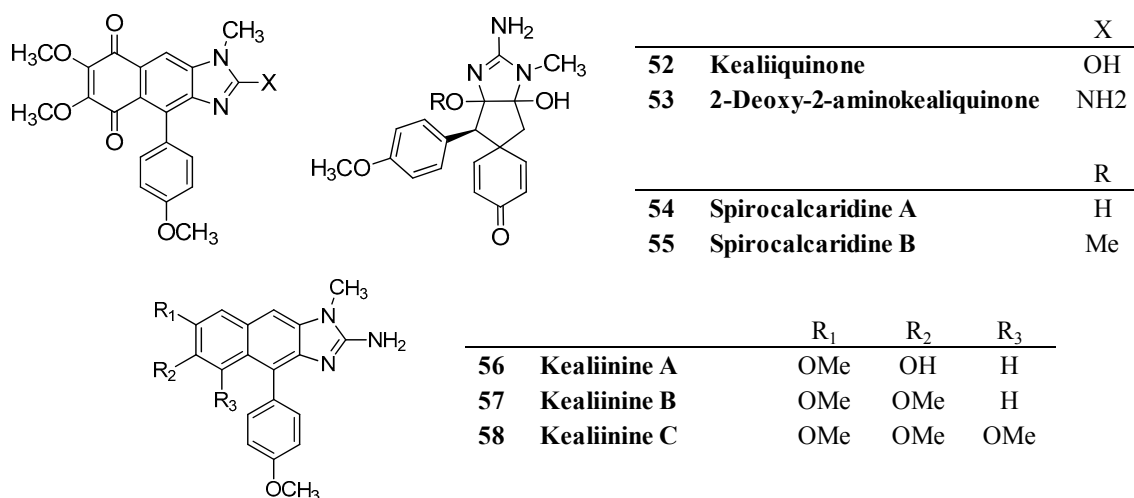**Category IV. 2-Aminoimidazolone alkaloids**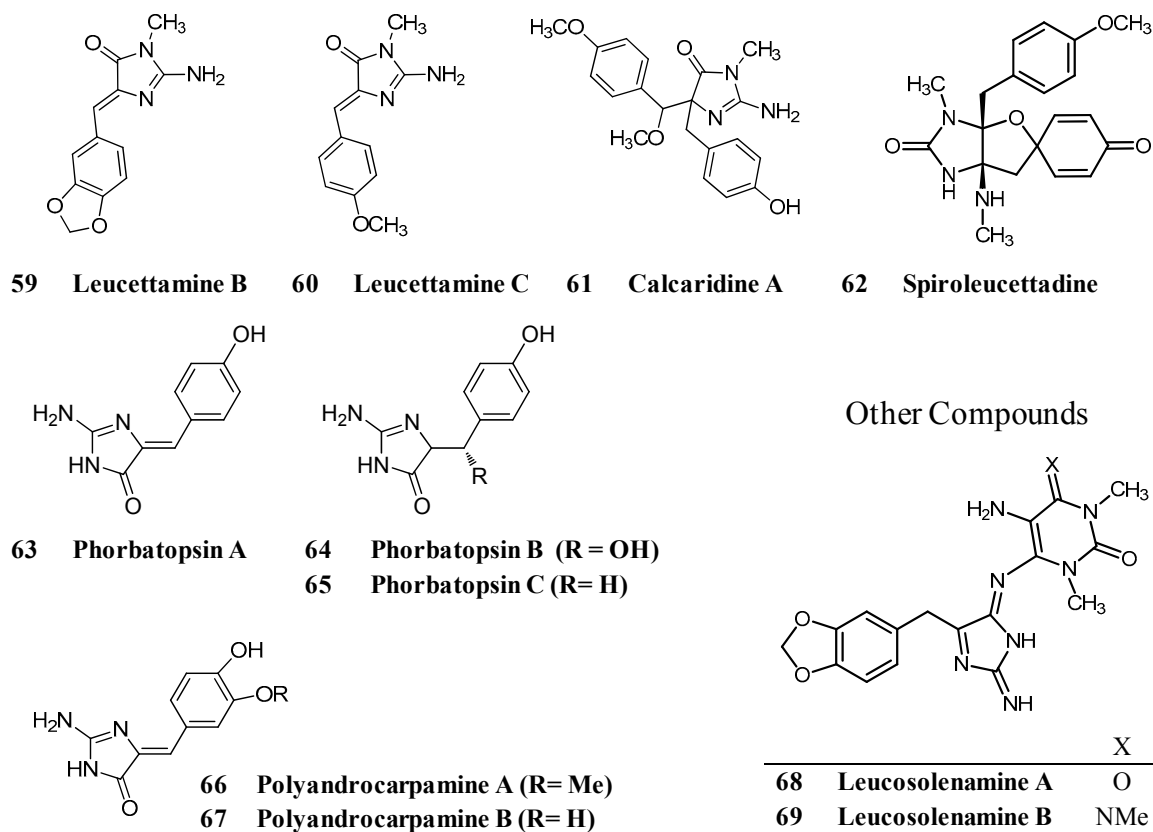



## SUPPLEMENTARY REFERENCES

- Aberle, N. S.; Lessene, G.; Watson, K. G. A concise total synthesis of naamidine A. *Org. Lett.* **2006**, *8*, 419-421.
- Aberle, N.; Ovenden, S.P.B.; Lessene, G.; Watson, K.G.; Smith, B.J. Spiroleucettadine: synthetic studies and investigations towards structural revision. *Tetrahedron Lett.* **2007**, *48*, 2199-2203.
- Akee, R.K.; Carroll, T.R.; Yoshida, W.Y.; Scheuer, P.J.; Stout, T.J.; Clardy, J. Two imidazole alkaloids from a sponge. *J. Org. Chem.* **1990**, *55*, 1944-1946.
- Alvi, K. A.; Crews, P.; Loughhead, D.G. Structures and total synthesis of 2-aminoimidazoles from a *Notodoris nudibranch*. *J. Nat. Prod.* **1991**, *54*, 1509-1515.
- Alvi, K.A.; Peters, B.M.; Hunter, L.M.; Crews, P. 2-Aminoimidazoles and their zinc complexes from indo-pacific *Leucetta* sponges and *Notodoris nudibranchs*. *Tetrahedron* **1993**, *49*, 329-336.
- Boehm, J.C.; Gleason, J.G.; Pendrak, I.; Sarau, H.M.; Schmidt, D.B.; Foley, J.J.; Kingsbury, W.D. Synthesis and LTB<sub>4</sub> receptor antagonist activities of the naturally occurring LTB<sub>4</sub> receptor antagonist Leucettamine A and related analogues. *J. Med. Chem.* **1993**, *36*, 3333-3340.
- Borojevic, R.; Klautau, M. Calcareous sponges from New Caledonia. *Zoosystema* **2000**, *22*, 187-201.
- Borojevic, R.; Boury-Esnault, N.; Manuel, M.; Vacelet, J. Order *Clathrinida* Hartman, 1958. In: Hooper, J.N.A. & van Soest, R.W.M., editors. *Systema Porifera: a guide to the classification of sponges*. New York: Kluwer Academic/Plenum Publishers. **2002**, pp. 1141-52.
- Cardellina, J.H.; Meinwald, J. Leucettidine, a novel pteridine from the calcareous sponge *Leucetta microraphis*. *J. Org. Chem.* **1981**, *46*, 4782-4784.
- Carmely, S.; Ilan, M.; Kashman, Y. 2-Aminoimidazole alkaloids from the marine sponge *Leucetta chagosensis*. *Tetrahedron* **1989**, *45*, 2193-2200.
- Carmely, S.; Kashman, Y. Naamines and naamidines, novel imidazole alkaloids from the calcareous sponge *Leucetta chagosensis*. *Tetrahedron Lett.* **1987**, *28*, 3003-3006.
- Carroll, A.R.; Bowden, B.F.; Coll, J.C. New imidazole alkaloids from the *Sponge Leucetta sp.* and the associated predatory nudibranch *Notodoris gardineri*. *Aust. J. Chem.* **1993**, *46*, 1229-1234.
- Chan, G. W.; Mong, S.; Hemling, M.E.; Freyer, A.J.; Offen, P.H.; DeBrosse, C.W.; Sarau, H.M.; Westley, J.W. New leukotriene B<sub>4</sub> receptor antagonist: Leucettamine A and related imidazole alkaloids from the marine sponge *Leucetta microraphis*. *J. Nat. Prod.* **1993**, *56*, 116-121.
- Chérouvrier, J.R.; Carreaux, F.; Bazureau, J.P. Microwave-mediated solventless synthesis of new derivatives of marine alkaloid Leucettamine B. *Tetrahedron Lett.* **2002**, *43*, 3581-3584.
- Ciminiello, P.; Fattorusso, E.; Magno, S.; Mangoni, A. Clathridine and its zinc complex, novel metabolites from the marine sponge *Clathrina clathrus*. *Tetrahedron* **1989**, *45*, 3873-3878.
- Ciminiello, P.; Fattorusso, E.; Mangoni, A.; Di Blasio, B.; Pavone, V. Structure of clathridine zinc complex, a metabolite of the marine sponge *Clathrina clathrus*. *Tetrahedron* **1990**, *46*, 4387-4392.
- Copp, B.R.; Fairchild, C.R.; Cornell, L.; Casazza, A.M.; Robinson, S.; Ireland, C.M. Naamidine A is an antagonist of the epidermal growth factor receptor and an *in vivo* active antitumor agent. *J. Med. Chem.* **1998**, *41*, 3909-3911.
- Crews, P.; Clark, D.P.; Tenney, K. Variation in the alkaloids among indo-pacific *Leucetta* sponges. *J. Nat. Prod.* **2003**, *66*, 177-182.
- Das, J.; Bhan, A.; Mandal, S.S.; Lovely, C.J. Total syntheses and cytotoxicity of kealiiquinone, 2-deoxy-2-aminokealiiquinone and analogs. *Bioorg. Med. Chem. Lett.* **2013**, *23*, 6183-6187.
- Das, J.; Koswatta, P.B.; Jones, J.D.; Yousufuddin, M.; Lovely, C.J. Total syntheses of kealiinines A-C. *Org. Lett.* **2012**, *14*, 6210-6213.
- Davis, R.A.; Aalbersberg, W.; Meo, S.; Moreira da Rocha, R.; Ireland, C.M. The isolation and synthesis of polyandrocarpamines A and B. Two new 2-aminoimidazolone compounds from the Fijian ascidian, *Polyandrocarpa sp.* *Tetrahedron Lett.* **2002**, *58*, 3263-3269.
- Davis, R.A.; Baron, P.S.; Neve, J.E.; Cullinane, C. A microwave-assisted stereoselective synthesis of polyandrocarpamines A and B. *Tetrahedron Lett.* **2008**, *50*, 880-882.

- Debdab, M.; Renault, S.; Eid, S.; Lozach, O.; Meijer, L.; Carreaux, F.; Bazureau, J.-P. An efficient method for the preparation of new analogs of leucettamine B under solvent-free microwave irradiation. *Heterocycles* **2009**, *78*, 1191-1203.
- Dendy, A. Synopsis of the Australian *Calcarea Heterocoela* with a proposed classification of the group and descriptions of some new genera and species. *Proc. Roy. Soc. Victoria* **1892**, *5*, 69-116.
- Dendy, A. The Percy Sladen trust expedition to the Indian Ocean in 1905 (V). I. Report on the calcareous sponges collected by HMS 'Sealark' in the Indian Ocean. *Trans. Linn. Soc. London* **1913**, *16*, 1-29.
- Dunbar, D.C.; Rimoldi, J.M.; Clark, A.M.; Kelly, M.; Hamann, M.T. Anti-cryptococcal and nitric oxide synthase inhibitory imidazole alkaloids from the calcareous sponge *Leucetta cf. chagosensis*. *Tetrahedron* **2000**, *56*, 8795-8798.
- Edrada, R.A.; Stessman, C.C.; Crews, P. Uniquely modified imidazole alkaloids from a calcareous *Leucetta* sponge. *J. Nat. Prod.* **2003**, *66*, 939-942.
- Ermolat'ev, D.S.; Alifanov, V.L.; Rybakov, V.B.; Babaev, E.V.; Van der Eycken, E.V. A concise microwave-assisted synthesis of 2-aminoimidazole marine sponge alkaloids of the isonaamines Series. *Synthesis* **2008**, *13*, 2083-2088.
- Felsenstein, J. 1985. Confidence limits on phylogenies: an approach using the bootstrap. *Evolution* **39**, 783-791.
- Fu, X.; Barnes, J.R.; Do, T.; Schmitz, F.J. New imidazole alkaloids from the sponge *Leucetta chagosensis*. *J. Nat. Prod.* **1997**, *60*, 497-498.
- Fu, X.; Schmitz, F.J.; Tanner, R.S.; Kelly-Borges, M. New imidazole alkaloids and zinc complexes from the Micronesian sponge *Leucetta cf. chagosensis*. *J. Nat. Prod.* **1998**, *61*, 384-386.
- Gibbons, J.B.; Gligorich, K.M.; Welm, B.E.; Looper R.E. Synthesis of the reported structures for kealiinines B and C. *Org. Lett.* **2012**, *14*, 4734-4737.
- Gibbons, J.B.; Salvant, J.M.; Vaden, R.M.; Kwon, K.H.; Welm, B.E.; Looper, R.E. Synthesis of Naamidine A and Selective Access to N(2)-Acyl-2-aminoimidazole Analogues. *J. Org. Chem.* **2015**, *80*, 10076-10085.
- Gross, H.; Kehraus S.; König, G.M.; Woerheide, G.; Wright, A.D. New and biologically active imidazole alkaloids from two sponges of the genus *Leucetta*. *J. Nat. Prod.* **2002**, *65*, 1190-1193.
- Haeckel, E. Die kalkschwämme. Eine monographie, Vols 1-3. **1872**, Berlin: Reimer.
- Hassan, W.H.B.; Al-Taweel A.M.; Proksch P. Two new imidazole alkaloids from *Leucetta chagosensis* sponge. *Saudi Pharmaceutical J.* **2009**, *17*, 295-298.
- Hassan, W.; Edrada, R.; Ebel, R.; Wray, V.; Berg, A.; van Soest, R.; Wiryowidagdo, S.; Proksch, P. New imidazole alkaloids from the Indonesian sponge *Leucetta chagosensis*. *J. Nat. Prod.* **2004**, *67*, 817-822.
- He, H.; Faulkner, D. J.; Lee, A. Y.; Clardy, J. A new imidazole alkaloid from the marine sponge *Leucetta microrhaphis*. *J. Org. Chem.* **1992**, *57*, 2176-2178.
- Imesek, M.; Plese, B.; Pfannkuchen, M.; Godrijan, J.; Pfannkuchen, D. M.; Klautau, M.; Cetkovic, H. Integrative taxonomy of four *Clathrina* species of the Adriatic Sea, with the first formal description of *Clathrina rubra* Sarà, 1958. *Organisms Diversity & Evolution* **2014**, *14*, 21-29.
- Karaman, M.W.; Herrgard, S.; Treiber, D.K.; Gallant, P.; Atteridge, C.E.; Campbell, B.T.; Chan, K.W.; Ciceri, P.; Davis, M.I.; Edeen, P.T.; Faraoni, R.; Floyd, M.; Hunt, J.P.; Lockhart, D.J.; Milanov, Z.V.; Morrison, M.J.; Pallares, G.; Patel, H.K.; Pritchard, S.; Wodicka, L.M.; Zarrinkar, P.P. A quantitative analysis of kinase inhibitor selectivity. *Nat. Biotechnol.* **2008**, *26*, 127-132.
- Katoh, S.; Standley, D.M. MAFFT multiple sequence alignment software version 7: improvements in performance and usability (Outlines version 7). *Mol. Biol. Evol.* **2013**, *30*, 772-780.
- Kawasaki, I.; Taguchi, N.; Yoneda, Y.; Yamashita, M.; Ohta, S. Highly effective procedure for introduction of amino group into the 2-position of imidazole ring. *Heterocycles* **1996**, *43*, 1375-1379.

- Klautau, M.; Azevedo, F.; Córdor-Luján, B.; Rapp, H.T.; Collins, A.; Russo, C.A. A molecular phylogeny for the order *Clathrinida* rekindles and refines Haeckel's taxonomic proposal for calcareous sponges. *Integr. Comp. Biol.* **2013**, *53*, 447-461.
- Klautau, M.; Valentine, C. Revision of the genus *Clathrina* (*Porifera, Calcarea*). *Zool. J. Linnean Soc.* **2003**, *139*, 1-62.
- Koswatta, P.B.; Lovely, C.J. Expedient total syntheses of preclathridine A and clathridine A. *Tetrahedron Letters* **2009**, *50*, 4998-5000.
- Koswatta, P.B.; Lovely, C.J. Concise total synthesis of naamine G and naamidine H. *Chem. Commun.* **2010a**, *46*, 2148-2150.
- Koswatta, P.B.; Lovely, C.J. Total Syntheses of naamidine G and 14-methoxynaamidine G. *Tetrahedron Lett.* **2010b**, *51*, 164-166.
- Koswatta, P.B.; Sivappa, R.; Dias, H.V.; Lovely, C.J. Total synthesis of (+/-)-calcaridine A and (+/-)-epicalcaridine A. *Org. Lett.* **2008**, *10*, 5055-5058.
- von Lendenfeld, R. A monograph of the Australian sponges. III. The *Calcispongiae*. *Proc. Linnean Soc. New South Wales* **1885**, *9*, 1083-1150.
- Lima, H.M.; Garcia-Barboza, B.J.; Khatibi, N.N.; Lovely, C.J. Total syntheses of isonaamine C and isonaamidine E. *Tetrahedron Lett.* **2011**, *52*, 5725-5727.
- Ling, Y.; Wang, Z.Q.; Xiao, Y.A.; Zhu, C.; Shen, L.; Wang, X.M.; Hui, Y.; Wang, X.Y. Benzylidene 2-aminoimidazolones derivatives: synthesis and in vitro evaluation of anti-tumor carcinoma activity. *Chem. Pharm. Bull. (Tokyo)*, **2013**, *61*, 1081-1084.
- Mancini, I.; Guella, G.; Debitus, C.; Pietra, F. Novel naamidine-type alkaloids and mixed-ligand zinc(II) complexes from a calcareous sponge, *Leucetta* sp., of the Coral Sea. *Helv. Chim. Acta* **1995**, *78*, 1178-1184.
- Molina, P.; Fresneda, P.M.; Sanz, M.A. Synthesis of marine alkaloids isonaamine A, dorimidazole A, and preclathridine A. Imminophosphorane-mediated preparation of 2-amino-1,4-disubstituted imidazoles from  $\alpha$ -azido esters. *J. Org. Chem* **1999**, *64*, 2540-2544.
- Nakamura, S.; Kawasaki, I.; Yamashita, M.; Ohta, S. 1-Methyl-3-trimethylsilylparabanic acid as an effective reagent for the preparation of N-substituted (1-methyl-2,5-dioxo-1,2,5H-imidazolin-4-yl)amines and its application to the total synthesis of isonaamidines A and C, antitumor imidazole alkaloids. *Heterocycles* **2003**, *60*, 583-598.
- Nguyen, T.D.; Nguyen, X.C.; Longeon, A.; Keryhuel, A.; Le, M.H.; Kim, Y.H.; Chau, V..M.; Bourguet-Kondracki, M.L. Antioxidant benzylidene 2-aminoimidazolones from the Mediterranean sponge *Phorbas topsenti*. *Tetrahedron*, **2012**, *68*, 9256-9259.
- Plubrukarn, A.; Smith, D.W.; Cramer, R.E.; Davidson, B.S. (2*E*,9*E*)-pyronaamidine 9-(*N*-methylimine), a new imidazole alkaloid from the Northern Mariana islands sponge *Leucetta* sp. cf. *chagosensis*. *J. Nat. Prod.* **1997**, *60*, 712-715.
- Ralifo, P.; Tenney, K.; Valeriote, F.A.; Crews, P. A distinctive structural twist in the aminoimidazole alkaloids from a calcareous marine sponge: isolation and characterization of leucosolenamines A and B. *J. Nat. Prod.* **2007**, *70*, 33-38.
- Ralifo, P.; Crews, P. A new structural theme in the imidazole-containing alkaloids from a calcareous *Leucetta* sponge. *J. Org. Chem.* **2004**, *69*, 9025-9029.
- Rossi, A.L.; Russo, C.A.M.; Solé-Cava, A.M.; Rapp, H.T.; Klautau, M. Phylogenetic signal in the evolution of body colour and spicule skeleton in calcareous sponges. *Zool. J. Linnean Soc.* **2011**, *163*, 1026-1034.
- Roué, M., Domart-Coulon I., Ereskovsky A., Djediat C., Perez T., Bourguet-Kondracki M. Cellular localization of clathridimine, an antimicrobial 2-aminoimidazole alkaloid produced by the Mediterranean calcareous sponge *Clathrina clathrus*. *J. Nat. Prod.* **2010**, *73*, 1277-1282.
- Roué, M., Quévrain, E., Domart-Coulon, I., Bourguet-Kondracki, M.L. Assessing calcareous sponges and their associated bacteria for the discovery of new bioactive natural products. *Nat. Prod. Rep.* **2012**, *29*, 739-751.

- Roué, N.; Bergman, J. Synthesis of the marine alkaloid Leucettamine B. *Tetrahedron* **1999**, *55*, 14729-14738.
- Selvaraju, M.; Sun, C.M. Unprecedented one-pot chemocontrolled entry to thioxoimidazolidinones and aminoimidazolones: synthesis of kinase inhibitor leucettamine B. *ACS Comb. Sci.* **2015**, *17*, 182-189.
- Solé-Cava, A.M.; Klautau, M.; Boury-Esnault, N.; Borojevic, R.; Thorpe, J.P. Genetic evidence for cryptic speciation in allopatric populations of 2 cosmopolitan species of the calcareous sponge genus *Clathrina*. *Marine Biol.* **1991**, *111*, 381-386.
- Tamura, K.; Stecher, G.; Peterson, D.; Filipiński, A.; Kumar, S. MEGA6: Molecular evolutionary genetics analysis (Version 6.0). *Mol. Biol. Evol.* **2013**, *30*, 2725–2729.
- Tsukamoto, S.; Kawabata, T.; Kato, H.; Ohta, T.; Rotinsulu, H.; Mangindaan, R.E.P.; van Soest, R.W.M.; Ukai, K.; Kobayashi, H.; Namikoshi, M. Naamidines H and I, cytotoxic imidazole alkaloids from the Indonesian marine sponge *Leucetta chagosensis*. *J. Nat. Prod.* **2007**, *70*, 1658-1660.
- Valderrama, D.; Rossi, A.L.; Solé-Cava, A.M.; Rapp, H.T.; Klautau, M. Revalidation of *Leucetta floridana* (Haeckel, 1872) (*Porifera, Calcareia*): a widespread species in the tropical western Atlantic. *Zool. J. Linnean Soc.* **2009**, *157*, 1-16.
- White, K.N.; Amagata, T.; Oliver, A.G.; Tenney, K.; Wenzel, P.J.; Crews, P. Structure revision of spiroleucettadine, a sponge alkaloid with a bicyclic core meager in H-atoms. *J. Org. Chem.* **2008**, *73*, 8719-8722.
- Wörheide, G.; Epp, S.L.; Macis, L. Deep genetic divergences among Indo-Pacific populations of the coral reef sponge *Leucetta chagosensis* (*Leucettidae*): founder effects, vicariance, or both? *BMC Evol. Biol.* **2008**, *8*, 24.
- Wörheide, G., Hooper, J.N.A. *Calcareia* from the Great Barrier Reef. 1: Cryptic *Calcinea* from Heron Island and Wistari Reef (Capricorn-Bunker Group). *Memoirs Queensland Mus.* **1999**, *43*, 859-891.
- Wörheide, G.; Hooper, J.N.A., Degnan, B.M. Phylogeography of western Pacific *Leucetta 'chagosensis'* (*Porifera: Calcareia*) from ribosomal DNA sequences: implications for population history and conservation of the Great Barrier Reef World Heritage Area (Australia). *Mol. Ecol.* **2002**, *11*, 1753-1768.
- Zavesky, B.P.; Babij, N.R.; Wolfe, J.P. Synthesis of substituted 2-aminoimidazoles via Pd-catalyzed alkyne carboamination reactions. Application to the synthesis of preclathridine natural products. *Org. Lett.* **2014**, *16*, 4952-4955.
